# Vast amounts of encoded items nullify but do not reverse the effect of sleep on declarative memory

1 Luca D. Kolibius<sup>1</sup>, Jan Born<sup>2,3</sup>, Gordon B. Feld<sup>2,4\*</sup>

2 <sup>1</sup> University of Birmingham, School of Psychology, Centre for Human Brain Health

3 <sup>2</sup> University of Tübingen, Institute of Medical Psychology and Behavioral Neurobiology

4 <sup>3</sup> University of Tübingen, Centre for Integrative Neuroscience

5 <sup>4</sup> Central Institute of Mental Health, Mannheim, Germany

6 \* **Correspondence:**

7 Gordon B. Feld

8 [gordon.feld@zi-mannheim.de](mailto:gordon.feld@zi-mannheim.de)

9 **Keywords: memory, sleep, declarative, consolidation, interference, synaptic**  
10 **downscaling, bayesian statistics, sleep deprivation**

## 11 **Abstract**

12 Sleep strengthens memories by repeatedly reactivating associated neuron ensembles. Our  
13 studies show that although long-term memory for a medium number of word-pairs (160)  
14 benefits from sleep, a large number (320) does not. This suggest an upper limit to the amount  
15 of information that has access to sleep-dependent declarative memory consolidation, which is  
16 possibly linked to the availability of reactivation opportunities. Due to competing processes of  
17 global forgetting that are active during sleep, we hypothesised that even larger amounts of  
18 information would enhance the proportion of information that is actively forgotten during  
19 sleep. In the present study, we aimed to induce such forgetting by challenging the sleeping  
20 brain with vast amounts of to be remembered information. For this, 80 participants learned a  
21 very large number of 640 word-pairs over the course of an entire day and then either slept or  
22 stayed awake during the night. Recall was tested after another night of regular sleep. Results  
23 revealed comparable retention rates between the sleep and wake groups. Although this null-  
24 effect can be reconciled the concept of limited capacities available for sleep-dependent  
25 consolidation, it contradicts our hypothesis that sleep would increase forgetting compared to  
26 the wake group. Additional exploratory analyses relying on equivalence testing and Bayesian  
27 statistics reveal that there is evidence against sleep having a detrimental effect on the retention  
28 of declarative memory at high information loads. We argue that forgetting occurs in both  
29 wake and sleep states through different mechanisms, i.e., through increased interference and  
30 through global synaptic downscaling, respectively. Both of these processes might scale  
31 similarly with information load.

## 32 **1 Introduction**

33 It is undisputed that sleep is integral to the formation of long-term memory (Diekelmann &  
34 Born, 2010; Klinzing et al., 2019; Rasch & Born 2013; Walker & Stickgold, 2010). Initially,  
35 the idea prevailed that sleep predominantly acts as a passive shield against interference from  
36 novel information, as put forward by Jenkins and Dallenbach (Jenkins & Dallenbach, 1924).  
37 Even though modern interpretations of this framework still exist, it is now generally accepted

38 that sleep plays an active role for memory (Ellenbogen, Payne, & Stickgold, 2006), with the  
39 two-stage model of memory formation (Diekelmann & Born, 2010; Marr, 1971; Klinzing, et  
40 al., 2019; Rasch & Born, 2013) being the prevailing model used in declarative memory  
41 research. First introduced by Marr (1971) it offers a solution to the “stability-plasticity-  
42 dilemma” (Abraham & Robins, 2005), which refers to the problem how a system can learn  
43 new information rapidly and in succession without overwriting older memories (Robins,  
44 1995).

45 Initially the hippocampus binds together distributed information in the cortex during  
46 encoding (Battaglia et al., 2011). During subsequent sleep the hippocampus repeatedly  
47 reactivates these memories in concert with the neocortical representations (Grosmark &  
48 Buzsáki, 2016; Ji & Wilson 2007; Khodagholy et al., 2017; Ólafsdóttir et al., 2016) thereby  
49 strengthening and reorganising the representations in the neocortex (Marshall & Born, 2007;  
50 McClelland et al., 1995). Reactivation of memory traces corresponds to sharp-wave/ripple  
51 events evident in the hippocampal local field potential recordings during sleep (Diba &  
52 Buzsáki, 2007) that coordinate with sleep spindles and sleep slow oscillations to drive active  
53 systems consolidation (Clemens et al., 2007; Staresina et al., 2015; Khodagholy et al. 2017).  
54 Although, sleep spindles and reactivation in form of sharp-wave/ripples can be enhanced to  
55 compensate for large amounts of learning material (Gais et al., 2002; Mölle et al., 2009), it is  
56 plausible that an active process of sleep on memory is limited by the amount of replay that  
57 can be accommodated. This reasoning is supported by findings in humans that working  
58 memory capacity predicts declarative memory retention across sleep (Fenn & Hambrick,  
59 2012).

60 In accordance with that, Feld et al. (2016) recently showed that memory consolidation  
61 of declarative content during sleep is limited in capacity. Here, participants learned either a  
62 short (40), medium (160) or long (320) list of word-pairs. Participants in the medium  
63 information load condition showed a large sleep-dependent memory advantage, whereas those  
64 in the high information load condition no longer displayed a sleep benefit. This pattern of  
65 results can be explained by a capacity limited process of active systems consolidation that  
66 leads to local potentiation of memory traces that is accompanied by a more global process of  
67 synaptic rescaling, that depotentiates synapses without being limited (Feld & Born, 2017;  
68 Tononi & Cirelli, 2014). Extrapolating from this, at even higher information loads the limited  
69 capacity for active systems consolidation is surpassed so that sleep would favour forgetting.

70 To test this, in the present study we doubled the information load from 320 to 640  
71 word-pairs. We hypothesized, that sleep leads to more forgetting of word-pairs compared to a  
72 wake group.

## 73 **2 Materials and Methods**

### 74 **3.1 Preregistration**

75 A rough outline of this study was preregistered at AsPredicted.org. It can be viewed through  
76 this link <http://aspredicted.org/blind.php?x=jc2y8t>.

### 77 **3.2 Participants**

78 A total of 78 healthy, non-smoking, German-speaking participants performed the complete  
79 study (two participants decided to drop out prematurely). They reported a regular wake-sleep  
80 cycle, no intake of regular medication (except contraceptives) or illegal substances, and at  
81 least the qualification to enter higher education. Beginning on the morning and throughout the  
82 experiment the intake of caffeine- and alcohol-containing beverages was prohibited.  
83 Participants were randomly assigned to either the wake condition ( $N = 40$ ; 21 female, age

84 mean: 22.9 years, from 18-28 years) or sleep condition ( $N = 38$ ; 19 female, age mean: 22.7  
85 years, from 18-29 years). Participants received adequate monetary compensation for their  
86 contribution and provided written informed consent prior to the experiment. The study was  
87 approved by the local ethics committee.

### 88 **3.3 Procedure**

89 Participants arrived at 11:00 h and were seated in a room with four individual work-stations  
90 that were positioned to minimize distractions from other participants. See Figure 1 for a  
91 timeline of the experimental procedure. After a general instruction, participants completed a  
92 working memory capacity test (automated operation span task, OSPAN; Unsworth et al.,  
93 2005). From 12:00 to 17:00 h, participants learned the 640 word-pairs during a learning phase  
94 divided into two parts of 320 word-pairs with a short snack break in between. The snack  
95 consisted of a pretzel and one piece of fruit. Participants were asked not to actively rehearse  
96 word-pairs during breaks and oral conversation was restricted. At 17:00 h, participants  
97 received a standardized lunch consisting of either Pizza or Pasta. From 17:30 to 22:30 h, the  
98 640 word-pairs were recalled (immediate recall) in two parts of 320 word-pairs each to  
99 estimate, how many word-pairs had been successfully encoded. Again, participants received a  
100 standardized snack in between the two parts. The snack consisted of two pieces of bread with  
101 cheese or salami and a piece of fruit. At the beginning and at the end of each experimental day  
102 as well as right before the immediate recall, the psychomotor vigilance task (PVT; Dinges et  
103 al., 1997) as well as the Stanford Sleepiness Scale (SSS; Hoddes et al., 1973) were  
104 administered (for details, see below). After recall, participants were assigned to either spend  
105 the night in the laboratory watching standardized animal documentaries (wake group) or to  
106 sleep at home (sleep group). Between 23:00 h on day 1 and 7:00 h on day 3 of the experiment,  
107 all participants wore an actigraph (ActiLife v4.4.0, ActiGraph, Pensacola, FL, USA).  
108 Participants staying in the laboratory were offered two snacks throughout the night and left  
109 the laboratory at 7:00 h. These snacks consisted of a piece of fruit, a cereal bar and two slices  
110 of raisin bread. All participants were instructed to refrain from sleeping during the day  
111 following the first experimental day. After the wake group had a recovery night, the second  
112 day of testing started at 8:00 h (delayed recall; around 33 hours after the end of the first  
113 experimental day). All participants declared compliance to the sleep-wake schedule of the  
114 experiment, which was ratified using actimetry data. At the end of the second experiment day  
115 participants had to complete a word generation task (for details, see below).

### 116 **3.4 Memory task**

117 The word-pair task was implemented using Presentation® (version 16.3, Neurobehavioural  
118 Systems, Berkeley, CA, USA) on computers running on Windows 7 and adapted from Feld et  
119 al. (2016). Prior to each learning or recall block of 40 slightly related word-pairs, participants  
120 were instructed how to perform the task followed by two mock trials of the task procedure.  
121 Each phase consisted of 16 blocks which amounts to 640 word-pairs per phase. After 8 blocks  
122 there was a longer, 30-minute break. During the learning phase, each word-pair was presented  
123 once for 4s (1s inter-stimulus interval) on a horizontal axis divided by a hyphen. The left word  
124 was always the cue word, whereas the right word was always the target word. The order in  
125 which each word-pair occurred within a 40 word-pair block was randomized and the order of  
126 the word-pair blocks was balanced between participants. The block order for each participant  
127 was the same for the learning phase and both recall phases. Blocks lasted for 20 minutes. In  
128 the learning phase this meant participants were actively encoding word-pairs for 200s (40  
129 pairs x 5s), while the remaining 1000s were spent listening to relaxing audio files. During  
130 recall, participants were presented the cue word and had 20s to type in their response. If

131 participants wanted to move on or could not remember the target word, they were able to skip  
132 to the next word-pair by pressing the return key. Participants were instructed to answer even if  
133 they were not certain of the answer, but to avoid guesses. The keyboard input was  
134 immediately displayed which made it possible to correct for mistakes. Similar to the learning  
135 phase, recall blocks were interweaved by periods during which participants listened to  
136 relaxing audios. Again, blocks would start 20 minutes apart which resulted in a minimum of  
137 400s of relaxing audio (if the participant used 20s to answer each cue word). The recall  
138 procedure was identical for the immediate recall after learning and the delayed recall two  
139 mornings later (Figure 1). Setting the duration of each block to 20 minutes provided two  
140 benefits: It reduced interference between the blocks and ensured an equal amount of time  
141 between each block during the learning phase and its' corresponding block during the  
142 retrieval phase. Word-pairs were scored manually. If the answer contained spelling mistakes,  
143 used the wrong gender or number, the answer was still checked as correct. In alignment with  
144 Feld et al. (2016), we used absolute retention performance (the number of correctly recalled  
145 words at immediate recall subtracted from the number of correctly recalled words at delayed  
146 recall) as the dependent variable.

### 147 **3.5 Working Memory (OSPAN)**

148 The automated operation span (OSPAN; Unsworth et al., 2005) is a computer-based test to  
149 assess working memory capacity. Participants are shown simple mathematical equations in  
150 alternation with letters. Their task is to decide if the equations are correct while remembering  
151 the letters in the order they were presented. After three to six trials an array of twelve letters is  
152 shown and participants are instructed to click on the previously shown letters. For our analysis  
153 we used the absolute score and a "partial load". The absolute score refers to the sum of all  
154 correctly recalled letters, whereas the partial load is calculated by summing up only the letters  
155 of the trials that were recalled in the correct order. One dataset was lost due to hardware  
156 malfunction. This resulted in 38 datasets in the sleep condition and 39 datasets in the wake  
157 condition.

### 158 **3.6 Control measures (RWT, PVT, SSS, Actimetry)**

159 In order to control for possible confounding variables, several measurements were taken. One  
160 of the detrimental effects of sleep deprivation is a diminished verbal fluency due to impaired  
161 retrieval processes (Harrison & Horne, 1997). To investigate, if, even after a recovery night,  
162 the wake condition was still suffering the negative consequences of sleep deprivation,  
163 participants completed a word generation task (RWT: Regensburger Wortflüssigkeits-Test)  
164 (Aschenbrenner et al., 2000). The assignment was to generate as many words as possible of a  
165 given category (hobbies), or to generate words that start with a specific letter (in this case  
166 "m") during a 2-minute period. For our analysis, we added up both results for a combined  
167 score. The PVT measures the participant's mean reaction speed and is an indicator of  
168 vigilance. The 5-minute test requires pressing the space bar, as soon as a bright red  
169 millisecond timer appears on the screen of a computer and starts counting up from 0000 in  
170 milliseconds immediately. The subject's reaction time is displayed as soon as the space bar is  
171 pressed. For our analysis, we calculated the mean reaction speed ( $1 / \text{reaction time}$ ) for each  
172 participant and the number of lapses, defined as reaction speed above 500ms (Dinges &  
173 Kribbs, 1991). Due to hard drive malfunction, we lost 6 datasets (3 in each condition) for the  
174 psychomotor vigilance task (PVT). The SSS consists of a single item measuring the  
175 subjective sleepiness on a scale of 1 ("Feeling active, vital, alert or wide awake") to 8  
176 ("Asleep") (Hoddes et al., 1973). Five actimetry datasets (one from the sleep condition) could  
177 not be recovered due to hardware malfunction.

## 178 3.7 Statistical analysis

179 All statistical analysis was conducted using SPSS Version 22.0.0 on a computer running on  
180 Windows 7 and Jamovi Version 1.0.4.0. Unless stated otherwise, we relied on a univariate  
181 analysis of variance (ANOVA) with experimental condition and sex as independent variables.  
182 The SSS and the PVT were analysed using a repeated measures ANOVA with each of the five  
183 data points as a within-subjects factor and condition and sex as between-subject factors. The  
184 significance threshold for all statistical tests was set at 0.05.

## 185 3 Results

### 186 3.1 Memory Performance

187 Recall in the wake group decreased from  $M_{Wake} = 117.85$  ( $SEM_{Wake} = 7.16$ ) at immediate  
188 recall to  $M_{Wake} = 106.65$  ( $SEM_{Wake} = 6.78$ ) at delayed recall. In the sleep group the number of  
189 remembered word-pairs decreased from  $M_{Sleep} = 112.08$  ( $SEM_{Sleep} = 9.93$ ) to  $M_{Sleep} = 103.61$   
190 ( $SEM_{Sleep} = 9.33$ ) at delayed recall. In a confirmatory analysis the sleep and the wake group  
191 did not differ in retention performance (the absolute amount of word-pairs that were forgotten  
192 from the immediate recall phase to the delayed recall) on the word-pair task ( $M_{Wake} = -11.2$   
193  $SEM_{Wake} = 1.73$ ,  $M_{Sleep} = -8.5$   $SEM_{Sleep} = 1.70$ ; sleep/wake:  $F_{1,74} = 1.25$ ,  $p = .27$ ; sex:  $F_{1,74} =$   
194  $0.012$ ,  $p = 0.91$ ; Figure 2). To provide an estimate of the evidence for the null effect we  
195 performed an equivalence test using the two one sided test procedure (Lakens et al., 2018)  
196 with upper and lower effect size bound set at  $d = \pm 0.2$ . Statistically this means we tested  
197 whether the hypotheses that the positive effect of sleep on memory retention is larger than  $d =$   
198  $0.2$  and that the negative effect of sleep on memory retention is larger than  $d = 0.2$  can be  
199 rejected with a one sided t-tests each. Here, there was evidence that a detrimental effect of  
200 sleep on retention larger than  $d = -0.20$  can be ruled out ( $t_{76} = 2.01$ ,  $p = 0.02$ ), whereas, there  
201 was no evidence against a positive effect of sleep larger than  $d = 0.20$  ( $t_{76} = 0.24$ ,  $p = 0.60$ ).  
202 This means that for sleep induced forgetting there is evidence against medium and large  
203 effects, whereas small effects ( $d \leq 0.2$ ) could exist in our paradigm. For sleep-dependent  
204 consolidation even effects larger than  $d = 0.2$  cannot be ruled in out. In addition to this  
205 analysis, following the null-hypothesis-testing (NHST) tradition, we also used Bayesian  
206 statistics to determine evidence for null effects. This analysis provides the likelihood of the  
207 model given the data, rather than the probability of the data given the model as in NHST.  
208 Similar to the equivalence test, calculating the one-sided Bayes factor provided evidence  
209 against a detrimental effect of sleep on memory, it came up with  $BF_{01} = 8.26$  in favour of the  
210 null, whereas, evidence against a positive effect of sleep versus the null was undecided  $BF_{01} =$   
211  $1.45$ . This means that the null hypothesis of no detrimental effect of sleep on memory is 8.26  
212 times more likely than the alternative hypothesis of a detrimental effect of sleep on memory in  
213 comparison with our wake condition.

214 Next, we investigated whether these results were due to either group having learned  
215 more words during the initial learning phase. Although the wake group descriptively learned  
216 slightly more word-pairs, this difference did not reach statistical significance (sleep/wake:  
217  $F_{1,74} = 0.17$ ,  $p = .68$ ).

### 218 3.2 Memory Performance Blockwise

219 To verify this null-result, we next explored the performance per block for each condition (the  
220 experiment consisted of 16 blocks of 40 word-pairs each). As before, the absolute difference  
221 was used as a dependent variable in a repeated measures ANOVA with the block (1 to 16) as  
222 the repeated measurement and sleep/wake condition and sex as between subject variables (see

223 Figure 3). However, no significant result emerged from this analysis (sleep/wake:  $F_{1,71} = 1.47$ ,  
224  $p = .22$ ; sex:  $F_{1,71} = 0.083$ ,  $p = .77$ ; sleep/wake \* block:  $F_{15,57} = 0.99$ ,  $p = 0.48$ ; sex \* block:  
225  $F_{15,57} = 0.83$ ,  $p = 0.64$ ).

### 226 3.3 Gains and Losses

227 Gains refer to words that were correctly recalled during delayed recall, but not during  
228 immediate recall. Losses accordingly refer to words that were correctly remembered during  
229 immediate recall, but not during delayed recall. Subjects in the sleep and wake condition both  
230 gained on average 12.3 words ( $SEM_{Wake} = 0.90$ ;  $SEM_{Sleep} = 0.87$ ). Participants in the wake  
231 group lost on average 23.5 words ( $SEM_{Wake} = 1.49$ ), while participants in the sleep group lost  
232 on average 20.79 words ( $SEM_{Sleep} = 1.62$ ). We found no statistically significant difference  
233 between groups for neither gains (sleep/wake:  $F_{1,74} = 0.001$ ,  $p = .97$ ), nor losses (sleep/wake:  
234  $F_{1,74} = 1.49$ ,  $p = .23$ ; Table 1).

### 235 3.4 Wrong Answers

236 Next, we analysed the incorrect answers in detail. We investigated if there were group  
237 differences between the number of repeated wrong answers (same wrong answer during  
238 encoding and retrieval). This was not the case ( $M_{Sleep} = 114.03$  ( $SEM_{Sleep} = 8.64$ ),  $M_{Wake} =$   
239  $105.85$  ( $SEM_{Wake} = 6.36$ ), sleep/wake:  $F_{1,74} = 0.64$ ,  $p = .43$ ; Table 1). Additionally, we  
240 explored whether the occurrence of empty responses differed between sleep/wake groups. We  
241 found no statistically significant difference between groups when considering the difference  
242 in absolute number of empty responses between immediate and delayed recall ( $M_{Sleep} = -7.42$   
243 ( $SEM_{Sleep} = 10.32$ ),  $M_{Wake} = 7.83$  ( $SEM_{Wake} = 14.70$ ), sleep/wake:  $F_{1,74} = 0.84$ ,  $p = .36$ ; Table  
244 1) or when considering the proportion of empty responses in all wrong answers ( $M_{Sleep} = -$   
245  $0.024$  ( $SEM_{Sleep} = 0.018$ ),  $M_{Wake} = 0.001$  ( $SEM_{Wake} = 0.026$ ), sleep/wake:  $F_{1,74} = 0.78$ ,  $p = .38$ ;  
246 Table 1). Likewise, there was no significant difference between groups regarding the  
247 difference in number of incorrect responses at immediate and delayed recall. (excluding  
248 empty responses) ( $M_{Sleep} = 15.89$  ( $SEM_{Sleep} = 9.59$ ),  $M_{Wake} = 3.38$  ( $SEM_{Wake} = 14.10$ ),  
249 sleep/wake:  $F_{1,74} = 0.65$ ,  $p = .42$ ; Table 1).

250 Word-pool errors refer to wrong answers containing a word that was learned at  
251 another point in the experiment (either as a cue word or as a target word). Using the relative  
252 occurrence within all wrong answers, we calculated the difference between word-pool errors  
253 during delayed recall and during immediate recall. We found no statistically significant  
254 difference between groups ( $M_{Sleep} = 0.012$  ( $SEM_{Sleep} = 0.009$ ),  $M_{Wake} = -0.006$  ( $SEM_{Wake} =$   
255  $0.009$ ), sleep/wake:  $F_{1,74} = 1.83$ ,  $p = .18$ ; Table 1).

### 256 3.5 Working Memory Capacity Task

257 We used a MANOVA because the two dependent variables correlated highly ( $r_{75} = 0.908$ ,  $p <$   
258  $.01$ ). The MANOVA revealed no difference in the  $OSPAN_{Absolute}$  score and the  $OSPAN_{Partial}$   
259 score between sleep and wake condition ( $M_{Absolute, Sleep} = 43.18$ ,  $SEM_{Absolute, Sleep} = 2.73$ ;  
260  $M_{Absolute, Wake} = 46.64$ ,  $SEM_{Absolute, Wake} = 2.88$ ;  $M_{Partial, Sleep} = 60.39$ ,  $SEM_{Partial, Sleep} = 1.57$ ;  
261  $M_{Partial, Wake} = 61.26$ ,  $SEM_{Partial, Wake} = 1.99$ ; sleep/wake:  $OSPAN_{Absolute}$ :  $F_{1,73} = 0.84$ ,  $p = .36$ ;  
262  $OSPAN_{Partial}$ :  $F_{1,73} = 0.12$ ,  $p = .73$ ; Table 2). To investigate the relation between working  
263 memory capacity and memory performance on the word-lists (using the difference score), we  
264 calculated a Pearson product-moment correlation between memory retention performance and  
265 working memory capacity separately for the sleep and wake conditions, and for the  $OSPAN$   
266 absolute and partial score. There was a trend towards significance when looking at the wake  
267 condition and the absolute  $OSPAN$  score ( $r_{39} = -.31$ ,  $p = .059$ ), while all other correlations

268 were insignificant ( $p > .11$ ). However, when considering all participants in both groups, there  
269 was a statistically relevant negative relation between retention performance and the absolute  
270 OSPAN score ( $r_{75} = -.27, p = .02$ ).

## 271 **3.6 Control Measures (Actimetry, SSS, PVT, RWT)**

### 272 **3.6.1 Actimetry Data**

273 To analyse actimetry data, we used a repeated measures ANOVA to compare both groups'  
274 activity levels in four 8h windows. We found a statistically significant sleep/wake \* time  
275 interaction ( $F_{1,92, 136,55} = 35.1, p < 0.001, \eta^2 = .33$ ; Greenhouse-Geisser corrected). Subsequent  
276 two-tailed t-tests revealed, that the difference was mainly driven by a difference in the first 8h  
277 window, i.e. during sleep deprivation in the wake group ( $t_{48,0} = -21.2, p < .001$ ; Figure 1b).

### 278 **3.6.2 Subjective Sleepiness (SSS)**

279 The SSS score at some time points was affected by the sleep/wake condition (sleep/wake \*  
280 time:  $F_{4,304} = 2.46, p = .046, \eta^2 = .031$ ). Individual two-tailed t-tests revealed that this  
281 difference was mainly driven by higher subjective sleepiness in the wake group during the  
282 fourth ( $t_{76} = -1.92, p = .058$ ) and fifth ( $t_{76} = -1.97, p = .053$ ) assessment points, which both  
283 occurred on the second day of the experiment (Table 2).

### 284 **3.6.3 Vigilance (PVT)**

285 There was no significant difference between groups' average reaction speed (all  $p > .24$ ).  
286 Likewise, there was no significant main effect or interaction of condition regarding the  
287 number of lapses (all  $p > .44$ ; Table 2).

### 288 **3.6.4 Word generation task (RWT)**

289 Analyses revealed no significant difference between conditions in the word generation task  
290 ( $F_{1,74} = 0.54, p = .47$ ; Table 2).

## 291 **4 Discussion**

292 Previous work suggests that sleep-dependent memory consolidation is a process limited in  
293 capacity and that learning large amounts of information overloads active systems  
294 consolidation and abolishes the positive effect of sleep on memory retention (Feld et al.  
295 2016). Extrapolating from this data, we hypothesized that at even higher loads of information  
296 during encoding sleep may favour forgetting over consolidation (Feld & Born 2017). Here,  
297 we directly tested this hypothesis by asking participants to encode a very large amount of  
298 information (640 word-pairs, twice the amount used before in the long list condition of Feld et  
299 al., 2016) before either a night of sleep or total sleep deprivation. Contrary to our predictions,  
300 we found word-pair retention to be comparable between the sleep and wake groups. While  
301 this null-effect can be reconciled with the view that capacities for consolidating memory  
302 during sleep are limited, it contradicts our hypothesis that sleep causes increased forgetting of  
303 declarative memory, when compared to wakefulness. It is important to note that sleep might  
304 still induce forgetting under conditions of massed learning, but that this effect might be  
305 masked by a direct comparison with a wake condition which itself induces forgetting (as  
306 discussed in detail below). A thorough post-hoc analysis revealed no group differences  
307 regarding a multitude of response patterns (such as gain and loss, word-pool errors and wrong  
308 answers).

309 In light of these results we propose that forgetting of memory traces could be achieved  
310 by different processes for the wake and sleep group, respectively. In the wake group, memory  
311 traces are more prone to interference, whereas during sleep memories are protected from  
312 interference (Ellenbogen, Hulbert et al., 2006, Wixted, 2005). However, in the sleep group,  
313 memories might be forgotten due to global synaptic downscaling (Tononi & Cirelli, 2006). In  
314 this scenario, our failure to find sleep enhanced forgetting would be explained by wake  
315 forgetting accelerating at a similar pace making it very difficult to dissociate these processes.  
316 Accordingly, if forgetting in the wake condition is primarily driven by interference within the  
317 task, then increasing or decreasing this interference (e.g. by making the stimulus material  
318 more or less semantically related) will lead to more forgetting in participants in the wake  
319 condition, but not in the sleep condition (Drosopoulos et al., 2007; Yonelinas et al., 2019).  
320 Likewise, task-unrelated interference could be manipulated by asking participants in the wake  
321 condition to learn an unrelated verbal memory task during sleep deprivation. Contrasting with  
322 the wake state, we assume that global synaptic downscaling causes forgetting in the sleep  
323 group, which could equally be manipulated in this paradigm. Since global synaptic  
324 downscaling is assumed to occur primarily during slow waves (Kim et al., 2019; Vyazovskiy  
325 et al., 2008), closed loop auditory stimulation could be employed to increase slow waves,  
326 causing more forgetting in participants that have previously encoded a high amount of  
327 information (Ngo et al., 2013). Conversely, preventing participants from reaching deep sleep  
328 should lead to less forgetting. This would prevent forgetting in two ways, first by preventing  
329 interference through new encoding, as long as sleep itself is maintained, and second by  
330 preventing synaptic downscaling during deep sleep.

331 An alternative account of the absence of an enhanced forgetting during sleep, induced  
332 by massed learning, can be derived by considering recent findings of synaptic downscaling  
333 mechanisms during sleep. Although it has been suggested that active systems consolidation is  
334 specific and selective, whereas synaptic downscaling is global and indiscriminate (e.g. Feld &  
335 Born, 2017), there also exists the opposite suggestion of selective downscaling during sleep  
336 (Tononi & Cirelli 2014). This latter account is largely based on findings of selective  
337 weakening of synapses during sleep, where only weaker, more plastic, synapses are erased,  
338 while stronger synapses remain stable (De Vivo et al., 2017). In addition, it has been found  
339 that sharp-wave/ripples (a correlate of memory reactivation during sleep) are involved in the  
340 depotentiation of synapses within the hippocampus (Norimoto et al., 2018), whereas they  
341 appear to be involved in the potentiation of synapses in the cortex during sleep spindles  
342 (Khodagholy et al., 2017). This offers the intriguing possibility that active systems  
343 consolidation and selective synaptic downscaling during sleep occur in a highly coordinated  
344 fashion, i.e., during the same reactivation events but in different brain areas. According to this  
345 framework the successful integration of memories into the knowledge stores of the cortex via  
346 active systems consolidation would signal the deletion of redundant memory traces from the  
347 hippocampus through synaptic downscaling. In conclusion, similar to active systems  
348 consolidation, selective synaptic downscaling during sleep might be limited by the number of  
349 available reactivations during sleep. This offers an explanation for the lack of sleep-induced  
350 net forgetting.

351 Turning to our findings on working memory, prior work by Fenn and Hambrick  
352 (2012) reported a positive relation between working memory and sleep related memory  
353 performance. In contrast to that, Feld et al. (2016) measured working memory performance  
354 before any sleep/wake intervention took place (which rules out any biases due to the circadian  
355 rhythms or sleep manipulation) and found no significant correlation between the two. Using  
356 the same methodology, in the present study, we found a negative correlation, although most  
357 did not reach significance. Given these contradicting findings, we suggest that sleep-  
358 dependent memory performance is likely independent of working memory functioning.



359           There are several limitations that were impossible to eliminate in this study and  
360 therefore possibly contribute to our results. (1) Variability in memory performance between  
361 subjects increases with list size and although the sample size was large in comparison to other  
362 studies (Ellenbogen, Hulbert et al., 2006; Igloi et al., 2015; Marshall et al., 2006; Ngo et al.,  
363 2013; Studte et al., 2017; Quigley et al., 2000) this probably decreased statistical power. To  
364 ameliorate this noise issue, criterion learning could be used in future studies, where learning is  
365 repeated until a certain percentage of word-pairs can be recalled correctly. Importantly, a  
366 study comparing different criteria found that a 60% criterion is well suited to tap into the  
367 sleep effect (Drosopoulos et al., 2007). We did not use this method, as it would have  
368 consumed significantly more time for learning, which would have made it impossible to space  
369 out learning and thus strongly increase interference effects. (2) It is possible, that not enough  
370 time had passed for sleep effects to emerge. Already Graves (1936) using nonsense-syllables  
371 found a sleep benefit only after 72h and not at shorter intervals. Similarly, Richardson and  
372 Gough (1963) did not find a sleep effect after 24h/48h, but after 144h. Especially, for large  
373 amounts of information it is conceivable that consolidation as well as forgetting is carried  
374 over to subsequent nights. (3) We tested declarative memories that were intentionally  
375 encoded. It might be that the underlying processes, such as an enhanced activation of  
376 prefrontal-hippocampal circuitry, preclude such information from sleep-dependent forgetting  
377 (Himmer et al., 2017), which stimulates the idea to compare, in future studies, sleep effects on  
378 high loads of intentionally and incidentally encoded memory.

379           To conclude, in the current experiment we did not find evidence that a high  
380 information load leads to more forgetting during sleep when compared to wakefulness. These  
381 findings can be explained by different mechanisms leading to forgetting in both brain states:  
382 interference-induced forgetting in the wake group and forgetting due to global synaptic  
383 downscaling in the sleep group. We propose several approaches how future studies can test  
384 this new hypothesis.

## 385 **Acknowledgments**

386 This research was supported by grants from the Deutsche Forschungsgemeinschaft (DFG)  
387 ‘SFB 654 ‘Plasticity and Sleep’ and the European Research Council (grant No. 883098  
388 SleepBalance) to Jan Born and a DFG Emmy Noether Grant (FE 1617/2-1) to Gordon Feld.  
389 The authors declare no competing financial interests.

## 390 **Declaration of conflicting interests**

391 The authors declared that they have no conflicts of interest with respect to their authorship or  
392 the publication of this article.

## 393 **References**

- 394 Abraham, W. C., & Robins, A. (2005). Memory retention—the synaptic stability versus  
395 plasticity dilemma. *Trends in Neurosciences*, 28(2), 73-78.
- 396 Allen, M., Poggiali, D., Whitaker, K., Marshall, T. R., & Kievit, R. (2018). Raincloud plots: a  
397 multi-platform tool for robust data visualization. *PeerJ Preprints*, 6, e27137v1.
- 398 Aschenbrenner, S., Tucha, O., & Lange, K. W. (2000). *RWT: Regensburger Wortflüssigkeits-*  
399 *Test*. Göttingen: Hogrefe.
- 400 Battaglia, F. P., Benchenane, K., Sirota, A., Pennartz, C. M., & Wiener, S. I. (2011). The  
401 hippocampus: hub of brain network communication for memory. *Trends in Cognitive*  
402 *Sciences*, 15(7), 310-318.

- 403 Clemens, Z., Mölle, M., Eröss, L., Barsi, P., Halász, P., & Born, J. (2007). Temporal coupling  
404 of parahippocampal ripples, sleep spindles and slow oscillations in humans. *Brain*,  
405 *130*(11), 2868-2878.
- 406 De Vivo, L., Bellesi, M., Marshall, W., Bushong, E. A., Ellisman, M. H., Tononi, G., & Cirelli,  
407 C. (2017). Ultrastructural evidence for synaptic scaling across the wake/sleep cycle.  
408 *Science*, *355*(6324), 507-510.
- 409 Diba, K., & Buzsáki, G. (2007). Forward and reverse hippocampal place-cell sequences during  
410 ripples. *Nature Neuroscience*, *10*(10), 1241-1242
- 411 Diekelmann, S., & Born, J. (2010). The memory function of sleep. *Nature Reviews*  
412 *Neuroscience*, *11*, 114–126. doi:10.1038/nrn2762
- 413 Dinges D., & Kribbs N. B. (1991). Performing while sleepy: effects of experimentally-induced  
414 sleepiness. In: T. H. Monk (Ed.), *Human performance and cognition. Sleep, sleepiness and*  
415 *performance* (pp. 97-128). Oxford, England: John Wiley.
- 416 Dinges, D. F., Pack, F., Williams, K., Gillen, K. A., Powell, J. W., Ott, G. E., . . . Pack, A. I.  
417 (1997). Cumulative sleepiness, mood disturbance, and psychomotor vigilance performance  
418 decrements during a week of sleep restricted to 4–5 hours per night. *Sleep*, *20*(4), 267-277.  
419 doi:10.1093/sleep/20.4.267
- 420 Drosopoulos, S., Schulze, C., Fischer, S., & Born, J. (2007). Sleeps function in the spontaneous  
421 recovery and consolidation of memories. *Journal of Experimental Psychology: General*,  
422 *136*(2), 169-183. doi:10.1037/0096-3445.136.2.169
- 423 Ellenbogen, J. M., Hulbert, J. C., Stickgold, R., Dinges, D. F., & Thompson-Schill, S. L. (2006).  
424 Interfering with theories of sleep and memory: Sleep, declarative memory, and associative  
425 interference. *Current Biology*, *16*, 1290-1294.
- 426 Ellenbogen, J. M., Payne, J. D., & Stickgold, R. (2006). The role of sleep in declarative memory  
427 consolidation: passive, permissive, active or none?. *Current Opinion in Neurobiology*,  
428 *16*(6), 716-722.
- 429 Feld, G. B., & Born, J. (2017). Sculpting memory during sleep: concurrent consolidation and  
430 forgetting. *Current Opinion in Neurobiology*, *44*, 20-27. doi:10.1016/j.conb.2017.02.012
- 431 Feld, G. B., Weis, P. P., & Born, J. (2016). The limited capacity of sleep-dependent memory  
432 consolidation. *Frontiers in Psychology*, *7*, 1-12. doi:10.3389/fpsyg.2016.01368
- 433 Fenn, K. M., & Hambrick, D. Z. (2012). Individual differences in working memory capacity  
434 predict sleep-dependent memory consolidation. *Journal of Experimental Psychology:*  
435 *General*, *141*(3), 404-410. doi:10.1037/a0025268
- 436 Gais, S., Mölle, M., Helms, K., & Born, J. (2002). Learning-dependent increases in sleep  
437 spindle density. *Journal of Neuroscience*, *22*(15), 6830-6834.
- 438 Graves, E. A. (1936). The effect of sleep on retention. *Journal of Experimental Psychology*,  
439 *19*(3), 316-322.
- 440 Grosmark, A. D., & Buzsáki, G. (2016). Diversity in neural firing dynamics supports both rigid  
441 and learned hippocampal sequences. *Science*, *351*(6280), 1440-1443.
- 442 Harrison, Y., & Horne, J. A. (1997). Sleep deprivation affects speech. *Sleep*, *20*(10), 871-877.
- 443 Himmer, L., Müller, E., Gais, S., & Schönauer, M. (2017). Sleep-mediated memory  
444 consolidation depends on the level of integration at encoding. *Neurobiology of Learning*  
445 *and Memory*, *137*, 101-106.
- 446 Hoddes, E., Zarcone, V., Smythe, H., Phillips, R., & Dement, W. C. (1973). Quantification of  
447 sleepiness: A new approach. *Psychophysiology*, *10*(4), 431-436. doi:10.1111/j.1469-  
448 8986.1973.tb00801.x
- 449 Igloi, K., Gaggioni, G., Sterpenich, V., & Schwartz, S. (2015). A nap to recap or how reward  
450 regulates hippocampal-prefrontal memory networks during daytime sleep in humans. *Elife*,  
451 *4*, e07903.

- 452 Jenkins, J. G., & Dallenbach, K. M. (1924). Obliviscence during sleep and waking. *The*  
453 *American Journal of Psychology*, 35(4), 605-612.
- 454 Ji, D., & Wilson, M. A. (2007). Coordinated memory replay in the visual cortex and  
455 hippocampus during sleep. *Nature Neuroscience*, 10(1), 100.
- 456 Khodagholy, D., Gelinas, J. N., & Buzsáki, G. (2017). Learning-enhanced coupling between  
457 ripple oscillations in association cortices and hippocampus. *Science*, 358(6361), 369-372.
- 458 Kim, J., Gulati, T., & Ganguly, K. (2019). Competing roles of slow oscillations and delta waves  
459 in memory consolidation versus forgetting. *Cell*, 179(2), 514-526.
- 460 Klinzing, J. G., Niethard, N., & Born, J. (2019). Mechanisms of systems memory consolidation  
461 during sleep. *Nature Neuroscience*, 22(10), 1598-1610.
- 462 Lakens, D., Scheel, A. M., & Isager, P. M. (2018). Equivalence testing for psychological  
463 research: A tutorial. *Advances in Methods and Practices in Psychological Science*, 1(2),  
464 259-269.
- 465 Marr, D. (1971). Simple memory: A theory for archicortex. *Philosophical Transactions of the*  
466 *Royal Society London B*, 262, 23-81. doi:10.1098/rstb.1971.0078
- 467 Marshall, L., & Born, J. (2007). The contribution of sleep to hippocampus-dependent memory  
468 consolidation. *Trends in Cognitive Sciences*, 11(10), 442-450.  
469 doi:10.1016/j.tics.2007.09.001
- 470 Marshall, L., Helgadóttir, H., Mölle, M., & Born, J. (2006). Boosting slow oscillations during  
471 sleep potentiates memory. *Nature*, 444(7119), 610.
- 472 McClelland, J. L., McNaughton, B. L., & O'Reilly, R. C. (1995). Why there are complementary  
473 learning systems in the hippocampus and neocortex: Insights from the successes and  
474 failures of connectionist models of learning and memory. *Psychological Review*, 102(3),  
475 419-457. doi:10.1037/0033-295x.102.3.419
- 476 Mölle, M., Eschenko, O., Gais, S., Sara, S. J., & Born, J. (2009). The influence of learning on  
477 sleep slow oscillations and associated spindles and ripples in humans and rats. *European*  
478 *Journal of Neuroscience*, 29(5), 1071-1081.
- 479 Ngo, H. V. V., Martinetz, T., Born, J., & Mölle, M. (2013). Auditory closed-loop stimulation  
480 of the sleep slow oscillation enhances memory. *Neuron*, 78(3), 545-553.
- 481 Norimoto, H., Makino, K., Gao, M., Shikano, Y., Okamoto, K., Ishikawa, T., ... & Ikegaya, Y.  
482 (2018). Hippocampal ripples down-regulate synapses. *Science*, 359(6383), 1524-1527.
- 483 Ólafsdóttir, H. F., Carpenter, F., & Barry, C. (2016). Coordinated grid and place cell replay  
484 during rest. *Nature Neuroscience*, 19(6), 792.
- 485 Quigley, N., Green, J. F., Morgan, D., Idzikowski, C., & King, D. J. (2000). The effect of sleep  
486 deprivation on memory and psychomotor function in healthy volunteers. *Human*  
487 *Psychopharmacology: Clinical and Experimental*, 15(3), 171-177. doi:10.1002/(sici)1099-  
488 1077(200004)15:3<171::aid-hup155>3.0.co;2-d
- 489 Rasch, B., & Born, J. (2013). About sleep's role in memory. *Physiological Reviews*, 93(2), 681-  
490 766. doi:10.1152/physrev.00032.2012
- 491 Richardson, A., & Gough, J. E. (1963). The long range effect of sleep on retention. *Australian*  
492 *Journal of Psychology*, 15(1), 37-41.
- 493 Robins, A. (1995). Catastrophic forgetting, rehearsal and pseudorehearsal. *Connection Science*,  
494 7(2), 123-146.
- 495 Staresina, B. P., Bergmann, T. O., Bonnefond, M., Van Der Meij, R., Jensen, O., Deuker, L., ...  
496 & Fell, J. (2015). Hierarchical nesting of slow oscillations, spindles and ripples in the  
497 human hippocampus during sleep. *Nature Neuroscience*, 18(11), 1679.
- 498 Studte, S., Bridger, E., & Mecklinger, A. (2017). Sleep spindles during a nap correlate with  
499 post sleep memory performance for highly rewarded word-pairs. *Brain and Language*, 167,  
500 28-35.

- 501 Tononi, G., & Cirelli, C. (2006). Sleep function and synaptic homeostasis. *Sleep Medicine*  
502 *Reviews*, *10*(1), 49-62. doi:10.1016/j.smrv.2005.05.002
- 503 Tononi, G., & Cirelli, C. (2014). Sleep and the price of plasticity: from synaptic and cellular  
504 homeostasis to memory consolidation and integration. *Neuron*, *81*(1), 12-34.
- 505 Unsworth, N., Heitz, R. P., Schrock, J. C., & Engle, R. W. (2005). An automated version of the  
506 operation span task. *Behavior Research Methods*, *37*(3), 498-505. doi:10.3758/bf03192720
- 507 Vyazovskiy, V. V., Cirelli, C., Pfister-Genskow, M., Faraguna, U., & Tononi, G. (2008).  
508 Molecular and electrophysiological evidence for net synaptic potentiation in wake and  
509 depression in sleep. *Nature Neuroscience*, *11*(2), 200-208.
- 510 Walker, M. P., & Stickgold, R. (2010). Overnight alchemy: sleep-dependent memory evolution.  
511 *Nature Reviews Neuroscience*, *11*(3), 218.
- 512 Wixted, J. T. (2005). A theory about why we forget what we once knew. *Current Directions in*  
513 *Psychological Science*, *14*(1), 6-9.
- 514 Yonelinas, A. P., Ranganath, C., Ekstrom, A. D., & Wiltgen, B. J. (2019). A contextual binding  
515 theory of episodic memory: systems consolidation reconsidered. *Nature Reviews*  
516 *Neuroscience*, *20*(6), 364-375.

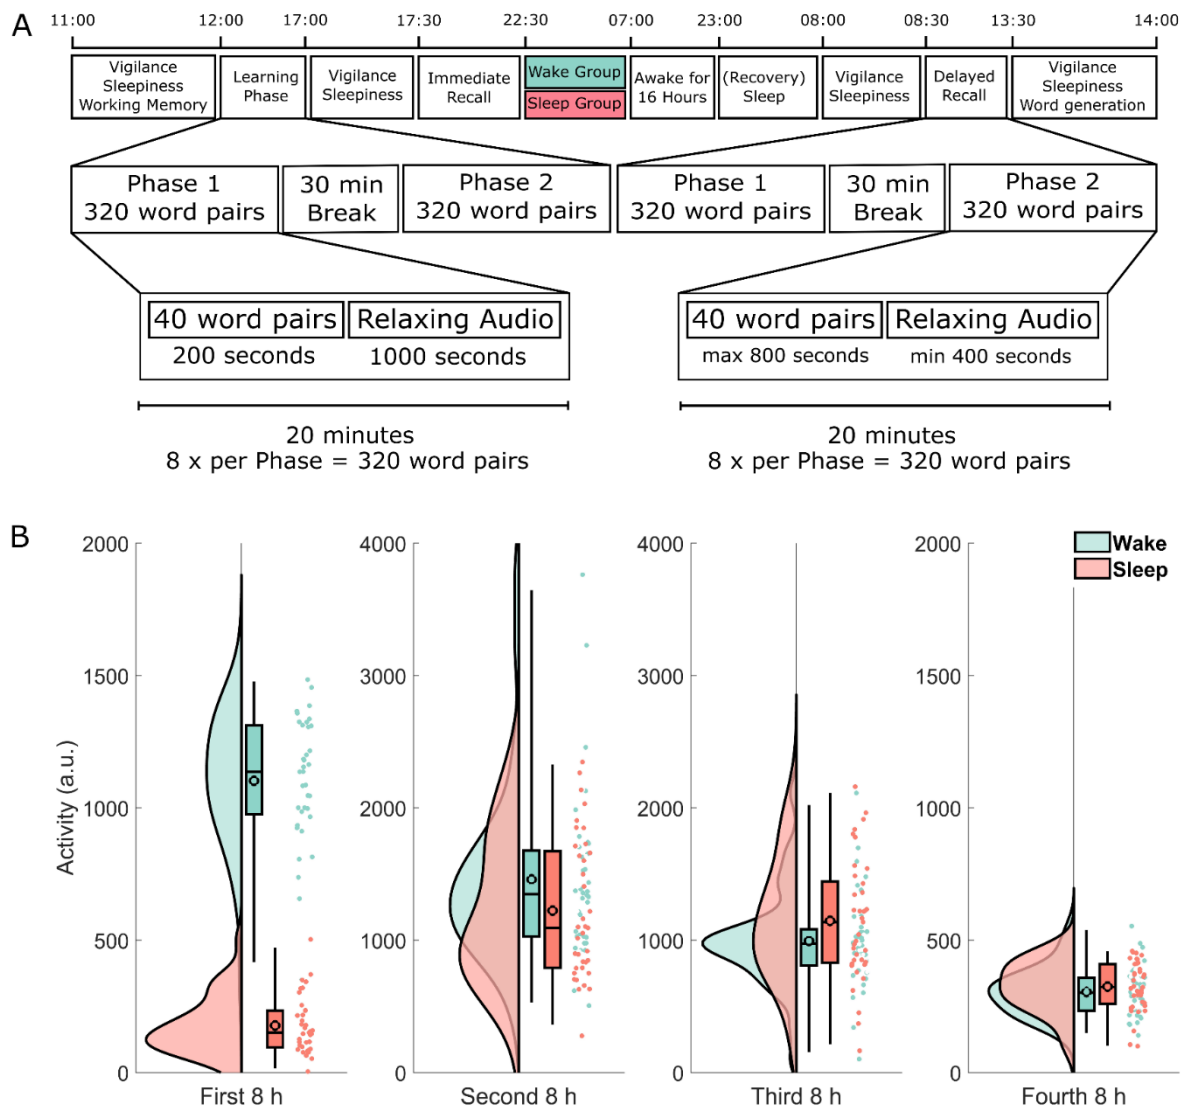

517 Figure 1. (A) Timeline of the experimental procedure. Learning started at 12:00 h and was  
 518 followed by an immediate recall at 17:30 h as well as a delayed recall at 8:00 h two days later.  
 519 The learning and recall phases each took five hours and consisted of two parts each roughly 2  
 520 hours 15 minutes long, separated by a 30 minute break. During each part, participants either  
 521 learned or retrieved 320 word-pairs for a total of 640 word-pairs. Each part was further divided  
 522 into eight blocks of 40 word-pairs. Each block took exactly 20 minutes. During the learning  
 523 phase participants spent 3 minutes and 20 seconds per block learning word-pairs one at a time  
 524 and then listened to 16 minutes and 40 seconds of relaxing audio files. During the recall phase  
 525 participants had up to 20 seconds (a maximum of 13 minutes and 20 seconds per block) to  
 526 respond to each of the sequentially shown cue words by typing the correct target word.  
 527 Participants spent the remaining time listening to a relaxing audio file. Note that both recall  
 528 phases (immediate and delayed recall) followed exactly the same procedure. (B) Actimetry  
 529 data. Each participant was given an actigraph at the end of immediate recall to verify  
 530 compliance. The y-axis shows the activity of each participant during each of the four eight-hour  
 531 periods in arbitrary units. Each raincloud plot consists of the estimated distribution, a box-plot  
 532 (indicating the median and the 2%, 25%, 98% quantiles, the black outlined circles depict the  
 533 mean) and the activity estimations for each subject as an individual point. Data from  
 534 participants in the wake group is shown in green, whereas data from the sleep group is shown

535 in red. Note the different scale used here. See Allen et al. (2018) for the code used in this  
536 visualisation.

537

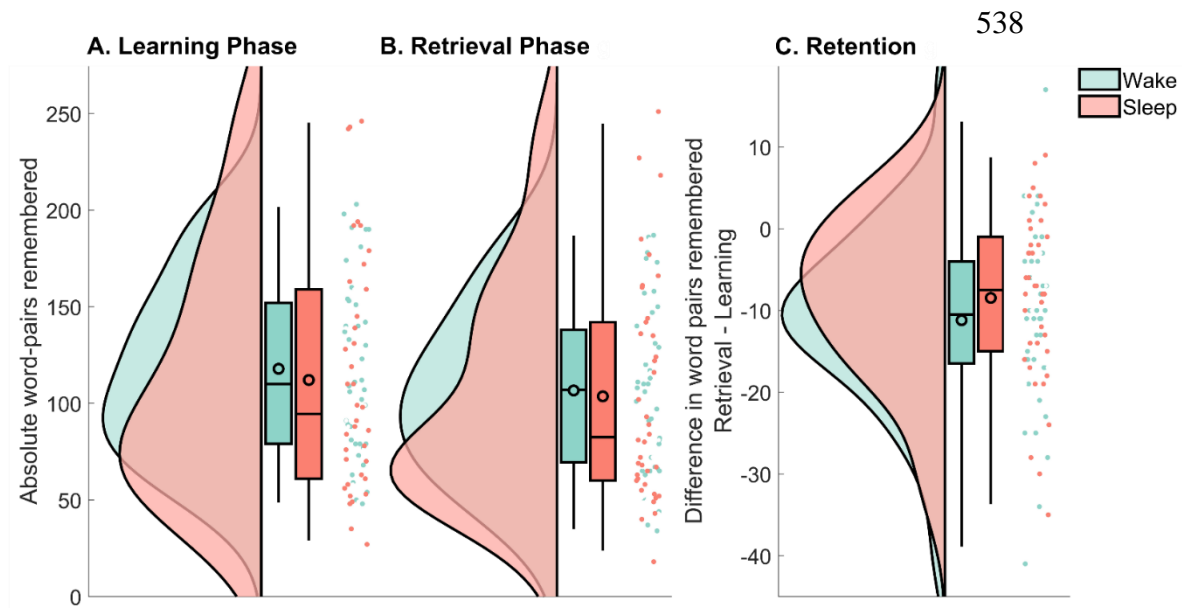

539 Figure 2. Raincloud plots (curves depict the estimated distribution, box-plots provide the  
540 median and the 2%, 25%, 75% and 98% quantiles, the black outlined circles depict the mean,  
541 the dots show individual data points) of the remembered word-pairs for the wake group (green)  
542 and the sleep group (red). **(A)** The absolute amount recalled during immediate recall that was  
543 part of the learning phase. **(B)** The absolute amount recalled during delayed recall that was part  
544 of the retrieval phase. **(C)** The difference in word-pairs remembered between retrieval and  
545 learning. Note the different scale used here. See Allen et al. (2018) for the code used in this  
546 visualisation.

547

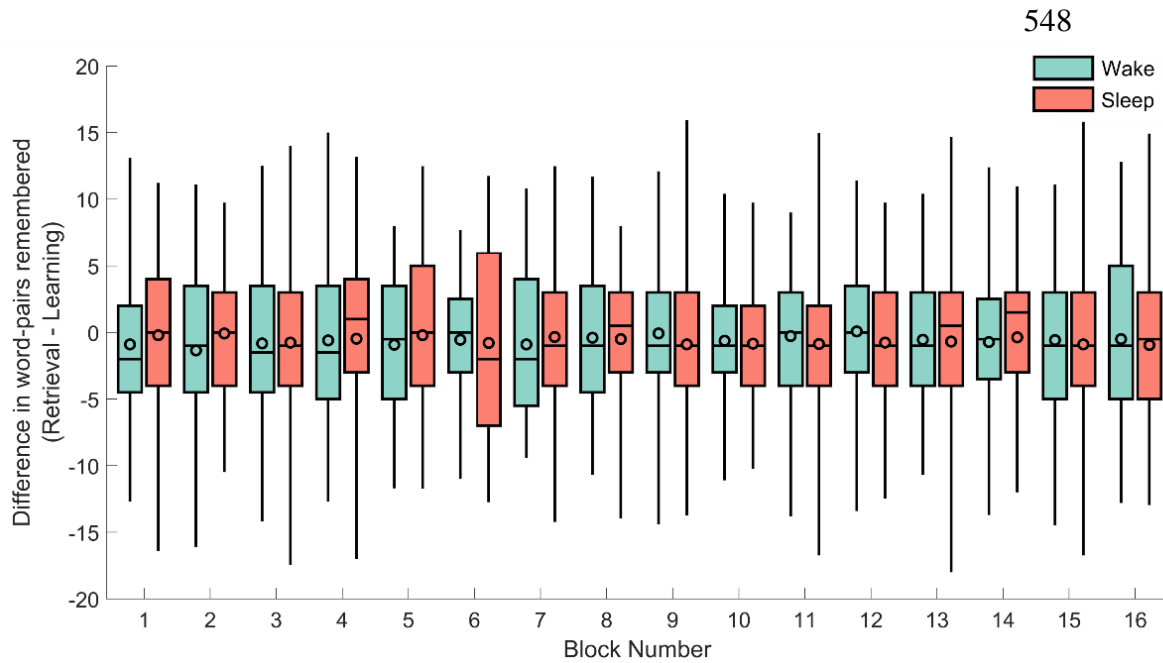

549 Figure 3. The difference in remembered word-pairs between the retrieval and learning phase  
550 for each of the individual 16 blocks for the sleep (red) and wake groups (green). The horizontal  
551 line of each box-plot indicates the median, the black outlined circles depict the mean, the border  
552 of the box indicates the 25% and 75% quartiles and the whiskers the 2% and 98% quartiles  
553 respectively.

554 Table 1. Mean and SEM (in brackets) for several measures of patterns within wrong answers.  
555 Contrasted between the wake group and the sleep group.

|                                                                    | <b>Wake Group<br/>Mean (SEM)</b> | <b>Sleep Group<br/>Mean (SEM)</b> |
|--------------------------------------------------------------------|----------------------------------|-----------------------------------|
| Gains <sup>1</sup>                                                 | 12.3 (0.90)                      | 12.3 (0.87)                       |
| Loss <sup>2</sup>                                                  | 23.5 (1.49)                      | 20.79 (1.62)                      |
| Number of repeated<br>wrong answers                                | 105.85 (6.36)                    | 114.03 (8.64)                     |
| Number of empty<br>responses <sup>3</sup>                          | 7.83 (14.70)                     | -7.42 (10.32)                     |
| Proportion of empty<br>responses <sup>3</sup>                      | 0.001 (0.026)                    | -0.024 (0.018)                    |
| Incorrect responses <sup>3</sup><br>(excluding empty<br>responses) | 3.38 (14.10)                     | 15.89 (9.59)                      |
| Word-pool error <sup>3, 4</sup>                                    | 0.012 (0.009)                    | -0.006 (0.009)                    |

556 <sup>1</sup> Correctly recalled during delayed recall, but not during immediate recall

557 <sup>2</sup> Correctly recalled during immediate recall, but not during delayed recall

558 <sup>3</sup> Difference between immediate and delayed recall

559 <sup>4</sup> Wrong answer was learned at another point in the experiment



560 Table 2. Mean and SEM (in brackets) for each of the control measures and the working  
561 memory test for the wake group and the sleep group.

|                      | <b>Wake Group<br/>Mean (SEM)</b> | <b>Sleep Group<br/>Mean (SEM)</b> |
|----------------------|----------------------------------|-----------------------------------|
| SSS – 1 <sup>1</sup> | 2.25 (0.14)                      | 2.32 (0.14)                       |
| SSS – 2 <sup>1</sup> | 3.15 (0.15)                      | 3.42 (0.14)                       |
| SSS – 3 <sup>1</sup> | 4.43 (0.19)                      | 4.32 (0.17)                       |
| SSS – 4 <sup>1</sup> | 3.28 (0.17)                      | 2.84 (0.15)                       |
| SSS – 5 <sup>1</sup> | 3.42 (0.20)                      | 2.89 (0.18)                       |
| PVT – 1 <sup>2</sup> | 3.19 (0.033)                     | 3.29 (0.038)                      |
| PVT – 2 <sup>2</sup> | 3.22 (0.038)                     | 3.29 (0.041)                      |
| PVT – 3 <sup>2</sup> | 3.21 (0.048)                     | 3.24 (0.046)                      |
| PVT – 4 <sup>2</sup> | 3.23 (0.038)                     | 3.26 (0.051)                      |
| PVT – 5 <sup>2</sup> | 3.25 (0.047)                     | 3.33 (0.044)                      |
| PVT – 1 (lapses)     | 0.55 (0.15)                      | 0.68 (0.12)                       |
| PVT – 2 (lapses)     | 0.53 (0.12)                      | 0.58 (0.13)                       |
| PVT – 3 (lapses)     | 0.63 (0.28)                      | 0.74 (0.22)                       |
| PVT – 4 (lapses)     | 0.77 (0.30)                      | 0.77 (0.20)                       |
| PVT – 5 (lapses)     | 0.74 (0.30)                      | 0.46 (0.17)                       |
| OSPAN (absolute)     | 46.6 (2.88)                      | 43.2 (2.7)                        |
| OSPAN (partial)      | 61.3 (1.99)                      | 60.4 (1.6)                        |
| RWT (total score)    | 41.3 (1.14)                      | 39.9 (1.3)                        |

562

---

<sup>1</sup> Stanford Sleepiness Scale from 1 (wide awake) to 8 (asleep)

<sup>2</sup> Reaction speed (defined as 1 / reaction time)
